# Supplementary material for: GLW7.1, a Strong Functional Allele of Ghd7, Enhances Grain Size in Rice
Source: Int J Mol Sci. 2022 Aug 5;23(15):8715. doi: 10.3390/ijms23158715 (PMC9369204; doi:10.3390/ijms23158715)
Supplement: Supplementary file 1 [file ijms-23-08715-s001.zip › Supplementary tables of GLW7.1.xlsx]

## Sheet: S1
Table S1 The primer sequences of markers used for map-based cloning and genotyping assays.
Markers	Location	F/R	Sequence (5'-3')	Type
RM481	Chr7	F	TAGCTAGCCGATTGAATGGC	SSR
		R	CTCCACCTCCTATGTTGTTG
RM501	Chr7	F	ATATCGTTTAGCCGTGCTGC	SSR
		R	GCCCAATTAATGTACAGGCG
G7.1	Chr7	F	CGTGGAGGTTTAGGAGCGTT	SSR
		R	AGATGAAGTTCACCGTGCAT
LG16	Chr7	F	GAGAGTGAAGGATGTCTAGTT	SSR
		R	AGTCAAGCATGGAACAGAA
LG18	Chr7	F	GCACGAGTCCAGGCATAT	SSR
		R	AGTACCAGCTCTTGTAGTAGTA
K1	Chr7	F1	GAAGGTGACCAAGTTCATGCTGATGCAGAATCTCGCATGAG	KASP
		F2	GAAGGTCGGAGTCAACGGATTGATGCAGAATCTCGCATGAC
		R	AGGAATCGGTCCTTACATG
K6	Chr7	F1	GAAGGTGACCAAGTTCATGCTCAGCGTCGGCATCACTATCG	KASP
		F2	GAAGGTCGGAGTCAACGGATTCAGCGTCGGCATCACTATCA
		R	AACAAAGGGCAAAGCTACAACT
K7	Chr7	F	CATAGGCAGTCAGTTGAG	KASP
		R1	GAAGGTGACCAAGTTCATGCTCTTAGTGGAGCAGATCTCAC
		R2	GAAGGTCGGAGTCAACGGATTCTTAGTGGAGCAGATCTCAG
G9.1	Chr7	F	AAGCAATCAAAGGGGGTGTC	SSR
		R	GTTGCTCGTCCTACATGTGC
K17	Chr7	F	GCATCAATGGAAGCAAGC	KASP
		R1	GAAGGTGACCAAGTTCATGCTACTCCTCCAAAGAGTCTACC
		R2	GAAGGTCGGAGTCAACGGATTACTCCTCCAAAGAGTCTACT
K18	Chr7	F	GAAGGTGACCAAGTTCATGCTCATGCCACAGAGAGAAGA	KASP
		R1	GAAGGTCGGAGTCAACGGATTCATGCCACAGAGAGAAGG
		R2	CCATTGAATCGAATCTGC
K19	Chr7	F1	GAAGGTGACCAAGTTCATGCTGCCATGACACAATTATAAGGCT	KASP
		F2	GAAGGTCGGAGTCAACGGATTGCCATGACACAATTATAAGGCC
		R	GTATCTCATCTAGTCCGAATCTG
K16	Chr7	F	AAACACATATGGGCTCCCGATT	KASP
		R1	GAAGGTGACCAAGTTCATGCTTCCCTCTGCATCTCCAATCC
		R2	GAAGGTCGGAGTCAACGGATTTCCCTCTGCATCTCCAATCG
K5	Chr7	F1	GAAGGTGACCAAGTTCATGCTTATAGCTGATGACGATTGTG	KASP
		F2	GAAGGTCGGAGTCAACGGATTTATAGCTGATGACGATTGTA
		R	GCCAGTGCTACGAGTTTA
LG5	Chr7	F	GCAGGAATTGGGTAAAGTAA	SSR
		R	GAATGTGGAATAGATGGAGT
G10.2	Chr7	F	GACCATCAGGCTCTTAAGTGC	SSR
		R	AGGGAACACAACAACCAAAGT
LG7	Chr7	F	AGCTTGTCAATTCCACTATG	SSR
		R	TCTGCACTTTCGTTAAACC
RM542	Chr7	F	TGAATCAAGCCCCTCACTAC	SSR
		R	CTGCAACGAGTAAGGCAGAG
RM214	Chr7	F	AAGAACAGCTGACTTCACAA	SSR
		R	CTGATGATAGAAACCTCTTCTC
LG15	Chr7	F	ACTGACCTATCCTCCTTGA	SSR
		R	CAGCAGATGGAATCATACAA
RM418	Chr7	F	GAGCACATATGCCACGTACG	SSR
		R	TCGCGTATCGTCATGCATAG
RM432	Chr7	F	TTCTGTCTCACGCTGGATTG	SSR
		R	AGCTGCGTACGTGATGAATG
RM560	Chr7	F	AGCCCGTGATACGGTGATAG	SSR
		R	GCAGGAGGAACAGAATCAGC
RM336	Chr7	F	CTTACAGAGAAACGGCATCG	SSR
		R	GCTGGTTTGTTTCAGGTTCG
RM473	Chr7	F	TATCCTCGTCTCCATCGCTC	SSR
		R	AAGGATGTGGCGGTAGAATG
RM234	Chr7	F	ACAGTATCCAAGGCCCTGG	SSR
		R	CACGTGAGACAAAGACGGAG
RM18	Chr7	F	GAGTGCCTGGCGCTGTAC	SSR
		R	TTCCCTCTCATGAGCTCCAT
RM478	Chr7	F	CAGCTGGGGAAGAGAGAGAG	SSR
		R	TCAGAAACTAAACGCACCCC
RM429	Chr7	F	CCTTCATCTTGCTTTCCACC	SSR
		R	TCCCTCCAGCAATGTCTTTC

## Sheet: S2
Table S2 The primer sequences of differential expression genes for qRT-PCR.
Primers	Sequence (5'-3')
ActinqF	TGGCATCTCTCAGCACATTCC
ActinqR	TGCACAATGGATGGGTCAGA
CYCD1;1qF	CCGTCGCTCGCATTCGTA
CYCD1;1qR	TCATGTGCCTGGTGGTGA
E2F2qF	TGTTGGTGGCTGCCGATAT
E2F2qR	CGCCAGGTGCACCCTTT
MCM4qF	CCCGAATGCGATTCTCTGAA
MCM4qR	ACCAGTGGCATGATCAGTTGC
CDC20qF	TCGAATCACCTGTTTGTTGGC
CDC20qR	TGGAGACAATCCAACGCAAAG
CYCA2.3qF	GTTTCGGTTGACGAGACGATGT
CYCA2.3qR	CGCTGCAAGGAACCTAGAACTG
CYCB1;1qF	CACTCTCAAGCACCACACTGGA
CYCB1;1qR	ACAACCCTCAGCTTGCTCTCAG
CYCIaZmqF	CACTCTCAAGCACCACACTGGA
CYCIaZmqR	ACAACCCTCAGCTTGCTCTCAG
MAPKqF	ACAGAGCAGCCGAATTTTGAGA
MAPKqR	TTCAGCGAAGCTCACACTTGG
CDKBqF	AAGTTTGGCCAGGAGTGAGCA
CDKBqR	TCAAGAGCATCAGCGTCGAGA
KNqF	CACCAGCTTCAAGAGATCGTGA
KNqR	CCGGAATTGAGACACAACTGC
EXPA3qF	CAGGGGTGTGGGTGTTTGAG
EXPA3qR	GCCTCTCCAGAACCTCGTAGC
EXPA4qF	GGCTATGCTGAGGCTGCTAATT
EXPA4qR	CTCCCCTTTACTACTACCACTACACT
EXPA5qF	AAGGCTGTGGCTTGATTGACA
EXPA5qR	TTAGGCCCAATTTTGCTATTTTG
EXPB3qF	CTTTGAGTGGTTGGAGTGGTGG
EXPB3qR	GCAGCCTTCTTGGAGATGGAA
OsBZR1qF	GACAACAACGAGGTGCTCAA
OsBZR1qR	GCTTACATCCCTTGCGGTAG
OsMAPK6qF	AGGTCACCGCCAAGTACAAG
OsMAPK6qR	AGCAGCTTGATCTCCCTGAG
Ghd7qF	AAGCCTATGCCGAGATGA
Ghd7qR	GTCCAAGCTCAAGCCTAC
GLW7qF	AACCCGCCGTTCCAGATCAG
GLW7qR	AAGAAGGGACGTAGGTGGTG
HLH107qF	CTCCAGCAAGACGGACAAAG
HLH107qR	CATCTGGACCTGGAGCTGAA
IPA1qF	TAGCCATCATGCCCACTTC
IPA1qR	AGACCAATCCATCGTGTTG
SRS3qF	TCCATTGAAGAGAAGCAGAG
SRS3qR	TCGGTGTCATCCATAGCA
SRS5qF	ATGAGGGAGTGCATCTCGAT
SRS5qR	CAAGATCGACGAAGACAGCA
OsWRKY53qF	CCCGGCTCAGAGGTACGA
OsWRKY53qR	TGCTGCTCTTGCTCCTTGAA
OsMADS1qF	GCTTCAGGCTTCAGAGAA
OsMADS1qR	GACAGATACAGACATACAGTAC
FUWAqF	AGCAACATTGTGCGAATAACTCC
FUWAqR	TTCCTGTATCATCCACGGCAA
GW2qF	CAGCAGCGCATTCCCAGTTTTC
GW2qR	GTGGTCAGCCGAGCACTCTC
OML4qF	CATTCTCTGCCTGAAGTCCA
OML4qR	GTCCTCGAGTTGGTTCCATT
GA2ox3qF	CGACTCCTTCTTCGTCAAC
GA2ox3qR	TGCAATCCTCTGTGCTAAC
GA3ox2qF	TCTTCTCCAAGCTCATGTGGT
GA3ox2qR	AACTCCTCCATCACGTCACAG
KAOqF	CGCAAGAGCAAAGGCTGAG
KAOqR	CCTGTGAGAGGAAGTGCATCTTCT
KO2qF	ACCGAGATGGTGATCAACCTG
KO2qR	CTTGTACATGTCCGCCACCTC
KS1qF	CCAGGCAAGGACAAGGGAC
KS1qR	ACGGATGCTGACGGGAAC
SLR1qF	GTGCAGCAGGAGAACTTCG
SLR1qR	CGGCGAAGGCGGCGTCG

## Sheet: S3
Table S3 The distance between markers K17 and K19 in five genomes.
KASP Primers	Flanking sequence of SNPs	Positions of SNPs in five genomes (bp)
		NIP_Chr7	ZS_Chr07	MH_Chr07	J23B_ctg30	CR071_tig2607
K17R1	ACTCCTCCAAAGAGTCTACC	9087252	9482653	9172450	396971
K17R2	ACTCCTCCAAAGAGTCTACT					1372707
K19F1	GCCATGACACAATTATAAGGCT		9551020		329058
K19F2	GCCATGACACAATTATAAGGCC	9193051		9295701		1494092
Distance (kb)		105.8	68.368	123.252	67.914	121.386
Notes: NIP, ZS and MH indicate Nipponbare, Zhenshan97 and Minghui63 respectively. The candidate segment was located on chromosome 7 in NIP, ZS and MH, ctg30 in J23B, tig2607 in CR071. The SNP (C/T) marker K17 showed C in NIP, ZS, MH and J23B, while showed T in CR071. The SNP (T/C) marker K19 showed T in ZS and J23B, while showed C in NIP, MH and CR071.

## Sheet: S4
Table S4 Haplotypes distribution of Ghd7 in 533 core germplasms.
Haplotypes	No.	Names	Subpopulations	Variation IDs
				vg0709154754	vg0709154664	vg0709154489	vg0709154469	vg0709154456	vg0709154415	vg0709152671	vg0709152659	vg0709152655	vg0709152479
Hap1	C001	Sadu-cho	IndI	T	G	C	G	G	A	G	G	T	G
Hap4	C002	Dom Sufid	VI	T	G	C	G	A	G	G	G	A	C
Hap4	C003	Gerdeh	Jap_Admix	T	G	C	G	A	G	G	G	A	C
Hap4	C004	Li-Jiang-Xin-Tuan-Hei-Gu	TeJ	T	G	C	G	A	G	G	G	A	C
Hap4	C005	AZUCENA	TrJ	T	G	C	G	A	G	G	G	A	C
Hap2	C006	Shan-Huang Zhan-2	Ind_Admix	T	G	G	G	G	A	G	A	T	C
Hap2	C007	Swarna	Ind_Admix	T	G	G	G	G	A	G	A	T	C
Hap1	C008	MOROBEREKAN	Ind_Admix	T	G	C	G	G	A	G	G	T	G
Hap2	C009	CYPRESS	Ind_Admix	T	G	G	G	G	A	G	A	T	C
Hap4	C010	IR64	TrJ	T	G	C	G	A	G	G	G	A	C
Hap1	C011	Tainong67	IndII	T	G	C	G	G	A	G	G	T	G
Hap4	C012	N 22	TeJ	T	G	C	G	A	G	G	G	A	C
Hap4	C013	M202	Aus	T	G	C	G	A	G	G	G	A	C
Hap4	C014	Dular	Jap_Admix	T	G	C	G	A	G	G	G	A	C
Hap4	C015	Laoguangtou83	Aus	T	G	C	G	A	G	G	G	A	C
Hap6	C016	Baimaodao	TeJ	T	T	C	G	A	G	G	G	A	C
Hap4	C017	AnnongwanjingB	TeJ	T	G	C	G	A	G	G	G	A	C
Hap6	C018	Ajiaonante	TeJ	T	T	C	G	A	G	G	G	A	C
Hap9	C019	Guangluai4hao	IndI	DEL	DEL	DEL	DEL	DEL	DEL	DEL	DEL	DEL	DEL
Hap9	C020	xiangaizao10	IndI	DEL	DEL	DEL	DEL	DEL	DEL	DEL	DEL	DEL	DEL
Hap9	C021	Jing7623	IndI	DEL	DEL	DEL	DEL	DEL	DEL	DEL	DEL	DEL	DEL
Hap9	C022	JinnanteB	IndI	DEL	DEL	DEL	DEL	DEL	DEL	DEL	DEL	DEL	DEL
Hap4	C023	Funingzipi	TeJ	T	G	C	G	A	G	G	G	A	C
Hap9	C024	zhenshan97B	IndI	DEL	DEL	DEL	DEL	DEL	DEL	DEL	DEL	DEL	DEL
Hap2	C025	Qingsiai16B	Ind_Admix	T	G	G	G	G	A	G	A	T	C
Hap4	C026	Weiguo	TeJ	T	G	C	G	A	G	G	G	A	C
Hap9	C027	Dianrui409B	Ind_Admix	DEL	DEL	DEL	DEL	DEL	DEL	DEL	DEL	DEL	DEL
Hap4	C028	Liaojing287	TeJ	T	G	C	G	A	G	G	G	A	C
Hap4	C029	Huhui628	Jap_Admix	T	G	C	G	A	G	G	G	A	C
Hap3	C030	88B	Ind_Admix	T	G	C	G	G	A	G	G	T	C
Hap2	C031	Xianghui91269	Ind_Admix	T	G	G	G	G	A	G	A	T	C
Hap4	C032	Longhuamaohu	TeJ	T	G	C	G	A	G	G	G	A	C
Hap9	C033	Lucaihao	IndI	DEL	DEL	DEL	DEL	DEL	DEL	DEL	DEL	DEL	DEL
Hap4	C034	Zhonglouyihao1	TeJ	T	G	C	G	A	G	G	G	A	C
Hap4	C035	Yelicanghua	TeJ	T	G	C	G	A	G	G	G	A	C
Hap7	C036	Shufeng101	Ind_Admix	T	G	C	G	G	A	C	G	T	C
Hap2	C037	Chengduai3hao	IndI	T	G	G	G	G	A	G	A	T	C
Hap9	C038	Sankecui	Ind_Admix	DEL	DEL	DEL	DEL	DEL	DEL	DEL	DEL	DEL	DEL
Hap2	C039	Gongju73	IndI	T	G	G	G	G	A	G	A	T	C
Hap2	C040	Jiabala	IndI	T	G	G	G	G	A	G	A	T	C
Hap2	C041	Taishannuo	IndI	T	G	G	G	G	A	G	A	T	C
Hap2	C042	Guichao2hao	Ind_Admix	T	G	G	G	G	A	G	A	T	C
Hap1	C043	Huke3hao	IndI	T	G	C	G	G	A	G	G	T	G
Hap2	C044	Teqingxuanhui	Ind_Admix	T	G	G	G	G	A	G	A	T	C
Hap1	C045	Huangsiguizhan	Ind_Admix	T	G	C	G	G	A	G	G	T	G
Hap1	C046	Xiangwanxian3hao	Ind_Admix	T	G	C	G	G	A	G	G	T	G
Hap2	C047	Taizhong65hao	IndI	T	G	G	G	G	A	G	A	T	C
Hap4	C048	Zaoshunonghu6	TeJ	T	G	C	G	A	G	G	G	A	C
Hap1	C049	Jinyou1hao	Ind_Admix	T	G	C	G	G	A	G	G	T	G
Hap1	C050	Chengnongshuijing	IndII	T	G	C	G	G	A	G	G	T	G
Hap4	C051	PeiC122	Admix	T	G	C	G	A	G	G	G	A	C
Hap4	C052	Guihuahuang	TeJ	T	G	C	G	A	G	G	G	A	C
Hap1	C053	Momi	Ind_Admix	T	G	C	G	G	A	G	G	T	G
Hap4	C054	Xiushui115	TeJ	T	G	C	G	A	G	G	G	A	C
Hap1	C055	Sanbaili	IndI	T	G	C	G	G	A	G	G	T	G
Hap4	C056	Jindao1hao	TeJ	T	G	C	G	A	G	G	G	A	C
Hap4	C057	Dandongludao	Jap_Admix	T	G	C	G	A	G	G	G	A	C
Hap2	C058	Liusha1hao	IndI	T	G	G	G	G	A	G	A	T	C
Hap2	C059	Bawangbian1	IndI	T	G	G	G	G	A	G	A	T	C
	C060	Dongtingwanxian	IndI	T	G	DEL	G	G	A	G	DEL	T	C
Hap2	C061	Yangdao2hao	IndII	T	G	G	G	G	A	G	A	T	C
Hap1	C062	Zhengdao5hao	IndI	T	G	C	G	G	A	G	G	T	G
Hap4	C063	Jing87-304	TeJ	T	G	C	G	A	N	G	G	A	C
Hap4	C064	Sugeng2hao	TeJ	T	G	C	G	A	N	G	G	A	C
Hap1	C065	Hongwan1hao	Ind_Admix	T	G	C	G	G	A	G	G	T	G
Hap1	C066	Liushizao	IndI	T	G	C	G	G	A	G	G	T	G
Hap4	C067	Muxiqiu	TeJ	T	G	C	G	A	G	G	G	A	C
Hap1	C068	Taizhongxianxuan2	IndII	T	G	C	G	G	A	G	G	T	G
Hap1	C069	Dangyu5hao	IndII	T	G	C	G	G	A	G	G	T	G
Hap4	C070	Youmangzaojing	TeJ	T	G	C	G	A	G	G	G	A	C
Hap4	C071	Laohuzhong	TeJ	T	G	C	G	A	G	G	G	A	C
Hap1	C072	Nantehao	IndI	T	G	C	G	G	A	G	G	T	G
Hap1	C073	Esiniu	IndI	T	G	C	G	G	A	G	G	T	G
Hap4	C074	cunsanli	TeJ	T	G	C	G	A	G	G	G	A	C
Hap4	C075	Huangkezaonian	TeJ	T	G	C	G	A	G	G	G	A	C
Hap1	C076	Nantiangangjiu	IndI	T	G	C	G	G	A	G	G	T	G
Hap1	C077	Benbanggu	IndI	T	G	C	G	G	A	G	G	T	G
Hap1	C078	Qitoubaigu	Ind_Admix	T	G	C	G	G	A	G	G	T	G
Hap4	C079	Muguanuo	TeJ	T	G	C	G	A	N	G	G	A	C
Hap2	C080	Hanmadao	IndI	T	G	G	G	G	A	G	A	T	C
Hap1	C081	Heidu4	IndI	T	G	C	G	G	A	G	G	T	G
Hap4	C082	Gaoyangdiandao	TeJ	T	G	C	G	A	G	G	G	A	C
Hap4	C083	chikenuo	TeJ	T	G	C	G	A	G	G	G	A	C
Hap4	C084	Haobuka	Jap_Admix	T	G	C	G	A	G	G	G	A	C
Hap4	C085	Shanjiugu	Jap_Admix	T	G	C	G	A	G	G	G	A	C
Hap4	C086	Fanhaopi	Aus	T	G	C	G	A	G	G	G	A	C
Hap4	C087	Lixinjing	TeJ	T	G	C	G	A	G	G	G	A	C
Hap1	C088	Baigedao	IndI	T	G	C	G	G	A	G	G	T	G
Hap4	C089	Tieganwu	TeJ	T	G	C	G	A	G	G	G	A	C
Hap1	C090	Sanlicun	Ind_Admix	T	G	C	G	G	A	G	G	T	G
Hap2	C091	Meihuanuo	IndI	T	G	G	G	G	A	G	A	T	C
Hap2	C092	Lamujia	IndI	T	G	G	G	G	A	G	A	T	C
Hap4	C093	Magunuo	TeJ	T	G	C	G	A	N	G	G	A	C
Hap1	C094	Menjiagao1	Ind_Admix	T	G	C	G	G	A	G	G	T	G
Hap1	C095	Xiaohonggu	IndI	T	G	C	G	G	A	G	G	T	G
Hap8	C096	Jinxibai	Ind_Admix	C	G	C	A	G	G	G	G	T	C
Hap1	C097	Jinbaoyin	Ind_Admix	T	G	C	G	G	A	G	G	T	G
Hap8	C098	Hongainuo	Ind_Admix	C	G	C	A	G	G	G	G	T	C
Hap8	C099	Aizaizhan	Ind_Admix	C	G	C	A	G	G	G	G	T	C
Hap1	C100	Dongtingwanxian	Ind_Admix	T	G	C	G	G	A	G	G	T	G
Hap4	C101	Babaili	TeJ	T	G	C	G	A	N	G	G	A	C
Hap8	C102	Qiyuexian	Ind_Admix	C	G	C	A	G	G	G	G	T	C
Hap4	C103	Yuyannuo	TeJ	T	G	C	G	A	N	G	G	A	C
Hap2	C104	Mamagu	IndI	T	G	G	G	G	A	G	A	T	C
Hap4	C105	Qingke	Ind_Admix	T	G	C	G	A	N	G	G	A	C
Hap4	C106	Hongkezhenuo	TeJ	T	G	C	G	A	N	G	G	A	C
Hap1	C107	Mowanggunei	IndIII	T	G	C	G	G	A	G	G	T	G
Hap2	C108	Honggu	IndI	T	G	G	G	G	A	G	A	T	C
Hap1	C109	Zimi	IndI	T	G	C	G	G	A	G	G	T	G
Hap2	C110	Xianggu	IndI	T	G	G	G	G	A	G	A	T	C
Hap4	C111	Ximaxian	TeJ	T	G	C	G	A	G	G	G	A	C
Hap9	C112	Jinnante43B	IndI	DEL	DEL	DEL	DEL	DEL	DEL	DEL	DEL	DEL	DEL
Hap9	C113	Xiangzaoxian7hao	Ind_Admix	DEL	DEL	DEL	DEL	DEL	DEL	DEL	DEL	DEL	DEL
Hap9	C114	80B	Ind_Admix	DEL	DEL	DEL	DEL	DEL	DEL	DEL	DEL	DEL	DEL
Hap1	C115	Baoxie123B	IndII	T	G	C	G	G	A	G	G	T	G
Hap4	C116	LimingB	TeJ	T	G	C	G	A	G	G	G	A	C
Hap9	C117	Jiangnongzao1hao	Ind_Admix	DEL	DEL	DEL	DEL	DEL	DEL	DEL	DEL	DEL	DEL
Hap1	C118	Gu154	IndII	T	G	C	G	G	A	G	G	T	G
Hap1	C119	Ninghui21	TeJ	T	G	C	G	G	A	G	G	T	G
Hap4	C120	Shuiyuan300li	TeJ	T	G	C	G	A	N	G	G	A	C
Hap1	C121	XiangaiB	Ind_Admix	T	G	C	G	G	A	G	G	T	G
Hap2	C122	Aituogu151	IndI	T	G	G	G	G	A	G	A	T	C
Hap4	C123	Taidongludao	TrJ	T	G	C	G	A	G	G	G	A	C
Hap1	C124	menjiading2	Ind_Admix	T	G	C	G	G	A	G	G	T	G
Hap1	C125	Jiefangxian	IndI	T	G	C	G	G	A	G	G	T	G
Hap4	C126	Hongqi5hao	TeJ	T	G	C	G	A	G	G	G	A	C
Hap2	C127	Baikehualuo	IndI	T	G	G	G	G	A	G	A	T	C
Hap2	C128	Liuyezhan	IndI	T	G	G	G	G	A	G	A	T	C
Hap8	C129	Aihechi	Ind_Admix	C	G	C	A	G	G	G	G	T	C
Hap4	C130	Xiangnuo	TeJ	T	G	C	G	A	G	G	G	A	C
Hap1	C131	Xuanenchangtan	IndI	T	G	C	G	G	A	G	G	T	G
Hap2	C132	Jinzhinuo	Ind_Admix	T	G	G	G	G	A	G	A	T	C
Hap4	C133	Laohongdao	TeJ	T	G	C	G	A	G	G	G	A	C
Hap4	C134	Wuzidui	TeJ	T	G	C	G	A	N	G	G	A	C
Hap2	C135	Xibaizhan	IndI	T	G	G	G	G	A	G	A	T	C
Hap1	C136	Zegu	IndI	T	G	C	G	G	A	G	G	T	G
Hap4	C137	Cungunuo	TeJ	T	G	C	G	A	G	G	G	A	C
Hap4	C138	Lengshuigu	TeJ	T	G	C	G	A	G	G	G	A	C
Hap9	C139	Banjiemang	IndI	DEL	DEL	DEL	DEL	DEL	DEL	DEL	DEL	DEL	DEL
Hap1	C140	Wuzuhonggu	IndI	T	G	C	G	G	A	G	G	T	G
Hap1	C141	Nanganggu	IndI	T	G	C	G	G	A	G	G	T	G
Hap1	C142	Mowanggunei	IndIII	T	G	C	G	G	A	G	G	T	G
Hap2	C143	Qitougu	IndI	T	G	G	G	G	A	G	A	T	C
Hap4	C144	Huangpinuo	TeJ	T	G	C	G	A	N	G	G	A	C
Hap9	C145	ZS97	IndI	DEL	DEL	DEL	N	DEL	DEL	DEL	DEL	DEL	DEL
Hap4	C146	Nipponbare	TeJ	T	G	C	G	A	G	G	G	A	C
Hap1	C147	MH63	IndII	T	G	C	G	G	A	G	G	T	G
Hap1	C148	9311	IndII	T	G	C	G	G	A	G	G	T	G
Hap4	C149	Zhonghua11	TeJ	T	G	C	G	A	G	G	G	A	C
Hap4	C150	Balila	TeJ	T	G	C	G	A	G	G	G	A	C
Hap2	C151	Nanjing11	IndI	T	G	G	G	G	A	G	A	T	C
Hap4	C152	02428	TeJ	T	G	C	G	A	G	G	G	A	C
Hap4	C153	IRAT109	TrJ	T	G	C	G	A	G	G	G	A	C
Hap6	C154	Heigeng2hao	TeJ	T	T	C	G	A	G	G	G	A	C
Hap9	C155	Erjiunan1hao	IndI	DEL	DEL	DEL	DEL	DEL	DEL	DEL	DEL	DEL	DEL
Hap9	C156	ChaoyangyihaoB	IndI	DEL	DEL	DEL	DEL	DEL	DEL	DEL	DEL	DEL	DEL
Hap9	C157	L301B	IndI	DEL	DEL	DEL	DEL	DEL	DEL	DEL	DEL	DEL	DEL
Hap9	C158	Guangluai15	IndI	DEL	N	DEL	DEL	DEL	DEL	DEL	DEL	DEL	DEL
Hap9	C159	ZhuzhenB	IndI	DEL	DEL	DEL	DEL	DEL	DEL	DEL	DEL	DEL	DEL
	C160	Baoxie-7B	Ind_Admix	T	G	DEL	G	G	A	G	N	T	C
Hap9	C161	Gzhenshan97B	IndI	DEL	DEL	DEL	DEL	DEL	DEL	DEL	DEL	DEL	DEL
Hap1	C162	Nanxiongzaoyou	Ind_Admix	T	G	C	G	G	A	G	G	T	G
Hap1	C163	Zaoshuxianghei	IndII	T	G	C	G	G	A	G	G	T	G
Hap1	C164	IR661-1	IndII	T	G	C	G	G	A	G	G	T	G
Hap2	C165	Nanjing11	IndI	T	G	G	G	G	A	G	A	T	C
Hap9	C166	Gui630	Ind_Admix	T	DEL	N	G	DEL	A	G	N	DEL	C
Hap2	C167	76--1	Ind_Admix	T	G	G	G	G	A	G	A	T	C
Hap2	C168	Xugunuo	Ind_Admix	T	G	G	G	G	A	G	A	T	C
Hap2	C169	Taizhongzailai1	Ind_Admix	T	G	G	G	G	A	G	A	T	C
Hap1	C170	Xiangwanxian1hao	IndI	T	G	C	G	G	A	G	G	T	G
Hap4	C171	Xingguo	TeJ	T	G	C	G	A	G	G	G	A	C
Hap4	C172	Zhonghua8hao	TeJ	T	G	C	G	A	N	G	G	A	C
Hap2	C173	Aimakang	IndI	T	G	G	G	G	A	G	A	T	C
Hap1	C174	JWR221	IndII	T	G	C	G	G	A	G	G	T	G
Hap2	C175	Zhengxian232	Ind_Admix	T	G	G	G	G	A	G	A	T	C
Hap2	C176	Chenwan3hao	Ind_Admix	T	G	G	G	G	A	G	A	T	C
Hap4	C177	Maguzi	TeJ	T	G	C	G	A	G	G	G	A	C
Hap1	C178	Aimi	IndI	T	G	C	G	G	A	G	G	T	G
Hap4	C179	Haobayong1	TeJ	T	G	C	G	A	G	G	G	A	C
Hap2	C180	Wanlixian	IndI	T	G	G	G	G	A	G	A	T	C
Hap4	C181	Feidongtangdao	TeJ	T	G	C	G	A	G	G	G	A	C
Hap2	C182	Hengxianliangchun	IndI	T	G	G	G	G	A	G	A	T	C
Hap2	C183	Leihuozhan	IndI	T	G	G	G	G	A	G	A	T	C
Hap11	C184	Baikezaohe	IndI	T	G	G	G	G	A	G	G	T	C
Hap4	C185	Haomake(K)	Jap_Admix	T	G	C	G	A	G	G	G	A	C
Hap4	C186	San**qishi	Jap_Admix	T	G	C	G	A	G	G	G	A	C
Hap4	C187	Niankenuo	TeJ	T	G	C	G	A	G	G	G	A	C
Hap4	C188	Yangkenuo	TeJ	T	G	C	G	A	G	G	G	A	C
Hap4	C189	Putaohuang	TeJ	T	G	C	G	A	G	G	G	A	C
Hap1	C190	Xiangdao	IndI	T	G	C	G	G	A	G	G	T	G
Hap1	C191	Younian	IndI	T	G	C	G	G	A	G	G	T	G
Hap1	C192	Wukezhan	Ind_Admix	T	G	C	G	G	A	G	G	T	G
Hap2	C193	Zhongnong4hao	IndI	T	G	G	G	G	A	G	A	T	C
Hap8	C194	Minbeiwanxian	Ind_Admix	C	G	C	A	G	G	G	G	T	C
Hap4	C195	Hongmisandan	TeJ	T	G	C	G	A	G	G	G	A	C
Hap4	C196	Yuyannuo	TeJ	T	G	C	G	A	G	G	G	A	C
Hap2	C197	Maweinian	IndI	T	G	G	G	G	A	G	A	T	C
Hap1	C198	Zinuo	Ind_Admix	T	G	C	G	G	A	G	G	T	G
	C199	Beizinuo	IndI	T	G	C	G	G	A	G	G	T	N
Hap1	C200	Biwusheng	IndI	T	G	C	G	G	A	G	G	T	G
Hap1	C201	Yizhixiang	Ind_Admix	T	G	C	G	G	A	G	G	T	G
Hap1	C202	Xiaobaimi	IndI	T	G	C	G	G	A	G	G	T	G
Hap9	C203	Zaoxian240	IndI	DEL	DEL	DEL	DEL	DEL	DEL	DEL	DEL	DEL	DEL
Hap1	W001	Mayang Khang	IndI	T	G	C	G	G	A	G	G	T	G
Hap4	W002	E B Gopher	TrJ	T	G	C	G	A	G	G	G	A	C
Hap4	W003	C 5560	TrJ	T	G	C	G	A	G	G	G	A	C
Hap4	W004	Quinimpol	TrJ	T	G	C	G	A	G	G	G	A	C
Hap4	W005	TAICHU MOCHI 59	TrJ	T	G	C	G	A	G	G	G	A	C
Hap4	W006	WC 2811	TrJ	T	G	C	G	A	G	G	G	A	C
Hap4	W007	Criollo Chivacoa 2	TrJ	T	G	C	G	A	G	G	G	A	C
Hap4	W008	Secano do Brazil	TrJ	T	G	C	G	A	G	G	G	A	C
Hap1	W009	BERLIN	IndIII	T	G	C	G	G	A	G	G	T	G
Hap4	W010	Sel. No. 388	Jap_Admix	T	G	C	G	A	G	G	G	A	C
Hap4	W011	SHIMIZU MOCHI	TeJ	T	G	C	G	A	N	G	G	A	C
Hap6	W012	KRASNODARSKIJ 424	TeJ	T	T	C	G	A	G	G	G	A	C
Hap4	W013	Pergonil 15	TeJ	T	G	C	G	A	G	G	G	A	C
Hap4	W014	Red Khosha Cerma	VI	T	G	C	G	A	G	G	G	A	C
Hap1	W015	Safut Khosha	Aus	T	G	C	G	G	A	G	G	T	G
Hap6	W016	NORIN 11	TeJ	T	T	C	G	A	G	G	G	A	C
Hap4	W017	R 75	TrJ	T	G	C	G	A	G	G	G	A	C
Hap4	W018	UZ ROSZ M38	TeJ	T	G	C	G	A	G	G	G	A	C
Hap4	W019	H57-3-1	Jap_Admix	T	G	C	G	A	G	G	G	A	C
Hap4	W020	IARI 6626	Aus	T	G	C	G	A	G	G	G	A	C
Hap4	W021	Khao Luang	Jap_Admix	T	G	C	G	A	G	G	G	A	C
Hap4	W022	C 8429	TrJ	T	G	C	G	A	G	G	G	A	C
Hap1	W023	Warrangal Culture 1252	IndIII	T	G	C	G	G	A	G	G	T	G
Hap4	W024	Padi Pohon Batu	TrJ	T	G	C	G	A	G	G	G	A	C
Hap4	W025	NC 1/536	Aus	T	G	C	G	A	G	G	G	A	C
Hap2	W026	Won Son Zo No. 11	IndI	T	G	G	G	G	A	G	A	T	C
Hap4	W027	Chacareiro Uruguay	TeJ	T	G	C	G	A	G	G	G	A	C
Hap4	W028	Doble Carolina	Aus	T	G	C	G	A	G	G	G	A	C
Hap1	W029	Ai Chueh Ta Pai Ku	Ind_Admix	T	G	C	G	G	A	G	G	T	G
Hap1	W030	Thang 10	Ind_Admix	T	G	C	G	G	A	G	G	T	G
Hap2	W031	Sipirasikkam	IndI	T	G	G	G	G	A	G	A	T	C
Hap2	W032	TJ	IndI	T	G	G	G	G	A	G	A	T	C
Hap2	W033	PD 46	IndI	T	G	G	G	G	A	G	A	T	C
Hap1	W034	PATNAI 6	Aus	T	G	C	G	G	A	G	G	T	G
Hap2	W035	K8C-263-3	Ind_Admix	T	G	G	G	G	A	G	A	T	C
Hap1	W036	Chun 118-33	IndI	T	G	C	G	G	A	G	G	T	G
Hap1	W037	Manga Kely 694	Ind_Admix	T	G	C	G	G	A	G	G	T	G
Hap4	W038	BLUE STICK	TeJ	T	G	C	G	A	G	G	G	A	C
Hap2	W039	Nam Dawk Mai	IndI	T	G	G	G	G	A	G	A	T	C
Hap1	W040	INIAP 7	IndII	T	G	C	G	G	A	G	G	T	G
Hap4	W041	Onu B	TrJ	T	G	C	G	A	G	G	G	A	C
Hap1	W042	Red	Ind_Admix	T	G	C	G	G	A	G	G	T	G
Hap1	W043	Dichroa Alef Uslkij	Ind_Admix	T	G	C	G	G	A	G	G	T	G
Hap1	W044	BKN 6987-68-14	IndII	T	G	C	G	G	A	G	G	T	G
Hap4	W045	KUBANETS 508	TeJ	T	G	C	G	A	G	G	G	A	C
Hap1	W046	IR 9660-48-1-1-2	IndII	T	G	C	G	G	A	G	G	T	G
Hap4	W047	Jumli dhan	Jap_Admix	T	G	C	G	A	G	G	G	A	C
Hap1	W048	N-2703	Aus	T	G	C	G	G	A	G	G	T	G
Hap4	W049	PHUDUGEY	Aus	T	G	C	G	A	G	G	G	A	C
Hap4	W050	Ak Tokhum	VI	T	G	C	G	A	G	G	G	A	C
Hap1	W051	RP2151-173-1-8	IndII	T	G	C	G	G	A	G	G	T	G
Hap4	W052	HB-6-2	TeJ	T	G	C	G	A	G	G	G	A	C
Hap4	W053	GPNO 1106	TrJ	T	G	C	G	A	G	G	G	A	C
Hap1	W054	Toga	Ind_Admix	T	G	C	G	G	A	G	G	T	G
Hap4	W055	Ragasu	Admix	T	G	C	G	A	G	G	G	A	C
Hap4	W056	Tamanishiki	TeJ	T	G	C	G	A	G	G	G	A	C
Hap4	W057	Grassy	TrJ	T	G	C	G	A	G	G	G	A	C
Hap1	W058	Kao Chio Lin Chou	IndI	T	G	C	G	G	A	G	G	T	G
Hap4	W059	Niwahutaw Mochi	TeJ	T	G	C	G	A	G	G	G	A	C
Hap4	W060	Somewake	TeJ	T	G	C	G	A	G	G	G	A	C
Hap4	W061	Ardito	Jap_Admix	T	G	C	G	A	G	G	G	A	C
Hap3	W062	NANTON NO. 131	TrJ	T	G	C	G	G	A	G	G	T	C
Hap4	W063	Vary Tarva Osla	Jap_Admix	T	G	C	G	A	G	G	G	A	C
Hap4	W064	CSORNUJ	TeJ	T	G	C	G	A	G	G	G	A	C
Hap4	W065	R 67	TrJ	T	G	C	G	A	G	G	G	A	C
Hap1	W066	IR 238	Ind_Admix	T	G	C	G	G	A	G	G	T	G
Hap4	W067	Mitak	TrJ	T	G	C	G	A	G	G	G	A	C
Hap4	W068	Gazan	TeJ	T	G	C	G	A	G	G	G	A	C
Hap4	W069	99216	Aus	T	G	C	G	A	G	G	G	A	C
Hap1	W070	Shui Ya Jien	Ind_Admix	T	G	C	G	G	A	G	G	T	G
Hap1	W071	AKP 4	Ind_Admix	T	G	C	G	G	A	G	G	T	G
Hap1	W072	SORNAVARI	Aus	T	G	C	G	G	A	G	G	T	G
Hap1	W073	IR 2061-214-2-3	IndII	T	G	C	G	G	A	G	G	T	G
Hap1	W074	TAINUNG 45	Ind_Admix	T	G	C	G	G	A	G	G	T	G
Hap1	W075	Sapundali Local	Ind_Admix	T	G	C	G	G	A	G	G	T	G
Hap4	W076	Tauli	Aus	T	G	C	G	A	G	G	G	A	C
Hap4	W077	79	VI	T	G	C	G	A	G	G	G	A	C
Hap1	W078	B805D-MR-16-8-3	Ind_Admix	T	G	C	G	G	A	G	G	T	G
Hap1	W079	A 152	Admix	T	G	C	G	G	A	G	G	T	G
Hap2	W080	UZ ROS 59	IndI	T	G	G	G	G	A	G	A	T	C
Hap4	W081	Gasym Hany	VI	T	G	C	G	A	G	G	G	A	C
	W082	Celiaj	TeJ	T	N	C	G	A	G		G	A	C
Hap1	W083	CNTLR80076-44-1-1-1	Ind_Admix	T	G	C	G	G	A	G	G	T	G
Hap1	W084	IR 58614-B-B-8-2	Ind_Admix	T	G	C	G	G	A	G	G	T	G
Hap1	W085	KECHENGNUO NO. 4	Ind_Admix	T	G	C	G	G	A	G	G	T	G
Hap1	W086	4484	IndII	T	G	C	G	G	A	G	G	T	G
Hap9	W087	YOU-I B	IndI	DEL	DEL	DEL	G	DEL	DEL	DEL	N	DEL	DEL
Hap9	W088	CHUNJIANGZAO NO. 1	TeJ	DEL	G	DEL	DEL	DEL	DEL	DEL	DEL	DEL	DEL
Hap1	W089	Egyptian Wild Type	IndIII	T	G	C	G	G	A	G	G	T	G
Hap4	W090	C.B. II	Aus	T	G	C	G	A	G	G	G	A	C
Hap7	W091	Gallawa	Aus	T	G	C	G	G	A	C	G	T	C
Hap4	W092	Karayal	Aus	T	G	C	G	A	G	G	G	A	C
Hap1	W093	Srav Prapay	IndIII	T	G	C	G	G	A	G	G	T	G
Hap4	W094	Nang Bang Bentre	Aus	T	G	C	G	A	G	G	G	A	C
Hap4	W095	DJ 24	Aus	T	G	C	G	A	G	G	G	A	C
	W096	DJ 102	Aus	T	G	C	G	G	G	G	G	N	C
	W097	Santhi 990	Admix	T	G	C	G	G	G	G	G	N	C
Hap4	W098	UZ ROS 7-13	Aus	T	G	C	G	A	G	G	G	A	C
Hap4	W099	SL 22-620	Aus	T	G	C	G	A	G	G	G	A	C
Hap4	W100	Spin Mere	Aus	T	G	C	G	A	G	G	G	A	C
Hap1	W101	AMANE	Ind_Admix	T	G	C	G	G	A	G	G	T	G
Hap4	W102	Padi Tarab Arab	TrJ	T	G	C	G	A	G	G	G	A	C
Hap1	W103	P 35	Aus	T	G	C	G	G	A	G	G	T	G
Hap4	W104	CAROLINO 164	Aus	T	G	C	G	A	G	G	G	A	C
Hap4	W105	HKG 98	Aus	T	G	C	G	A	G	G	G	A	C
Hap1	W106	Daudzai Field Mix	Aus	T	G	C	G	G	A	G	G	T	G
Hap1	W107	JP 5	Ind_Admix	T	G	C	G	G	A	G	G	T	G
Hap4	W108	Hi Muke	Aus	T	G	C	G	A	G	G	G	A	C
Hap4	W109	WIR 911	TeJ	T	G	C	G	A	G	G	G	A	C
Hap4	W110	Lua Chua Chan	TrJ	T	G	C	G	A	G	G	G	A	C
Hap1	W111	Sereno	IndIII	T	G	C	G	G	A	G	G	T	G
Hap1	W112	ARC 10633	IndIII	T	G	C	G	G	A	G	G	T	G
Hap4	W113	Simpor	TrJ	T	G	C	G	A	G	G	G	A	C
Hap3	W114	Heo Trang	IndIII	T	G	C	G	G	A	G	G	T	C
Hap1	W115	THAVALU	Aus	T	G	C	G	G	A	G	G	T	G
Hap4	W116	WC 10253	TrJ	T	G	C	G	A	G	G	G	A	C
Hap6	W117	KRASNODARSKIJ 3352	TeJ	T	T	C	G	A	G	G	G	A	C
Hap4	W118	EMBRAPA 1200	TrJ	T	G	C	G	A	N	G	G	A	C
Hap4	W119	WAB462-10-3-1	TrJ	T	G	C	G	A	G	G	G	A	C
Hap4	W120	Bombilla	TeJ	T	G	C	G	A	G	G	G	A	C
Hap4	W121	TCHAMPA	Aus	T	G	C	G	A	G	G	G	A	C
Hap4	W122	BHIM DHAN	Jap_Admix	T	G	C	G	A	G	G	G	A	C
Hap4	W123	WC 3532	TrJ	T	G	C	G	A	G	G	G	A	C
Hap1	W124	Kin Shan Zim	IndI	T	G	C	G	G	A	G	G	T	G
Hap4	W125	Yong Chal Byo	Admix	T	G	C	G	A	G	G	G	A	C
Hap1	W126	Pan Ju	IndI	T	G	C	G	G	A	G	G	T	G
Hap4	W127	Buphopa	Jap_Admix	T	G	C	G	A	G	G	G	A	C
Hap4	W128	TAINO 38	Admix	T	G	C	G	A	G	G	G	A	C
Hap4	W129	2	VI	T	G	C	G	A	G	G	G	A	C
Hap4	W130	LUSITANO	TeJ	T	G	C	G	A	G	G	G	A	C
Hap4	W131	IARI 6621	Aus	T	G	C	G	A	G	G	G	A	C
Hap1	W132	Hsin Hsing Pai Ku	IndI	T	G	C	G	G	A	G	G	T	G
Hap2	W133	TD 70	Ind_Admix	T	G	G	G	G	A	G	A	T	C
Hap4	W134	Dara	Aus	T	G	C	G	A	G	G	G	A	C
Hap1	W135	Shimla Early	Ind_Admix	T	G	C	G	G	A	G	G	T	G
Hap4	W136	LA PLATA GENA F.A.	VI	T	G	C	G	A	G	G	G	A	C
Hap1	W137	CM1, HAIPONG	Ind_Admix	T	G	C	G	G	A	G	G	T	G
Hap2	W138	4595	IndI	T	G	G	G	G	A	G	A	T	C
	W139	A 5	TeJ	T	N	C	G	A	G	G	G	A	C
Hap7	W140	Ittikulama	Aus	T	G	C	G	G	A	C	G	T	C
Hap4	W141	DNJ 179	Aus	T	G	C	G	A	G	G	G	A	C
Hap4	W142	DNJ 121	Aus	T	G	C	G	A	G	G	G	A	C
Hap4	W143	Jyanak	Jap_Admix	T	G	C	G	A	G	G	G	A	C
Hap1	W144	Ao Chiu 2 Hao	IndI	T	G	C	G	G	A	G	G	T	G
Hap1	W145	GUYANE 1	Ind_Admix	T	G	C	G	G	A	G	G	T	G
Hap1	W146	10340	IndI	T	G	C	G	G	A	G	G	T	G
Hap2	W147	BR11	Ind_Admix	T	G	G	G	G	A	G	A	T	C
Hap1	W148	BR24	Ind_Admix	T	G	C	G	G	A	G	G	T	G
Hap2	W149	93072	Ind_Admix	T	G	G	G	G	A	G	A	T	C
Hap1	W150	108S	IndII	T	G	C	G	G	A	G	G	T	G
Hap1	W151	C418	IndII	T	G	C	G	G	A	G	G	T	G
Hap1	W152	CDR22	IndII	T	G	C	G	G	A	G	G	T	G
Hap9	W153	Chenghui448	IndII	DEL	DEL	DEL	DEL	DEL	DEL	DEL	DEL	DEL	DEL
Hap2	W154	Fengaizhan	IndII	T	G	G	G	G	A	G	A	T	C
Hap2	W155	Gang46B	Ind_Admix	T	G	G	G	G	A	G	A	T	C
Hap2	W156	Gumei2hao	IndI	T	G	G	G	G	A	G	A	T	C
Hap1	W157	Huajingxian74	Ind_Admix	T	G	C	G	G	A	G	G	T	G
Hap1	W158	M3122	Admix	T	G	C	G	G	A	G	G	T	G
Hap1	W159	R644	IndII	T	G	C	G	G	A	G	G	T	G
Hap4	W160	Shennong265	TeJ	T	G	C	G	A	G	G	G	A	C
Hap1	W161	Y134	IndII	T	G	C	G	G	A	G	G	T	G
Hap4	W162	Yuanjing7	TeJ	T	G	C	G	A	G	G	G	A	C
Hap2	W163	Yuexiangzhan	Ind_Admix	T	G	G	G	G	A	G	A	T	C
Hap9	W164	Zaoxian14	Ind_Admix	DEL	DEL	DEL	N	DEL	DEL	DEL	DEL	DEL	DEL
Hap2	W165	Zhong413	Ind_Admix	T	G	G	G	G	A	G	A	T	C
Hap2	W166	Zhongyouzao81	Ind_Admix	T	G	G	G	G	A	G	A	T	C
Hap2	W167	Zihui100	Ind_Admix	T	G	G	G	G	A	G	A	T	C
Hap1	W168	Bg90-2	IndII	T	G	C	G	G	A	G	G	T	G
Hap1	W169	IR72	IndII	T	G	C	G	G	A	G	G	T	G
Hap1	W170	PR106	IndII	T	G	C	G	G	A	G	G	T	G
Hap1	W171	TKM9	Ind_Admix	T	G	C	G	G	A	G	G	T	G
Hap1	W172	Amo13 (Sana)	IndII	T	G	C	G	G	A	G	G	T	G
Hap4	W173	Khazar	TrJ	T	G	C	G	A	G	G	G	A	C
Hap1	W174	Gayabyeo	IndII	T	G	C	G	G	A	G	G	T	G
Hap1	W175	Iksan438	Admix	T	G	C	G	G	A	G	G	T	G
Hap1	W176	Milyang23	IndII	T	G	C	G	G	A	G	G	T	G
Hap1	W177	MR185	IndII	T	G	C	G	G	A	G	G	T	G
Hap1	W178	Manawthukha	IndIII	T	G	C	G	G	A	G	G	T	G
Hap1	W179	Shwe Thwe Yin Hyv	IndII	T	G	C	G	G	A	G	G	T	G
Hap1	W180	Bg300	Ind_Admix	T	G	C	G	G	A	G	G	T	G
Hap2	W181	Bg94-1	Ind_Admix	T	G	G	G	G	A	G	A	T	C
Hap1	W182	CR203	IndII	T	G	C	G	G	A	G	G	T	G
Hap1	W183	OM997	IndII	T	G	C	G	G	A	G	G	T	G
Hap1	W184	PSB RC 28	IndII	T	G	C	G	G	A	G	G	T	G
Hap1	W185	PSB RC 66	IndII	T	G	C	G	G	A	G	G	T	G
Hap2	W186	TEQING	Ind_Admix	T	G	G	G	G	A	G	A	T	C
Hap2	W187	IR68552-55-3-2	Ind_Admix	T	G	G	G	G	A	G	A	T	C
Hap1	W188	IR66897B	IndII	T	G	C	G	G	A	G	G	T	G
Hap1	W189	IR58025B	IndII	T	G	C	G	G	A	G	G	T	G
Hap1	W190	Dhan4	IndII	T	G	C	G	G	A	G	G	T	G
Hap1	W191	Pusa (Basmatil)	Admix	T	G	C	G	G	A	G	G	T	G
Hap1	W192	ASD16	Admix	T	G	C	G	G	A	G	G	T	G
Hap4	W193	Dianjing	TeJ	T	G	C	G	A	G	G	G	A	C
Hap1	W194	F6	IndII	T	G	C	G	G	A	G	G	T	G
Hap2	W195	452	IndII	T	G	G	G	G	A	G	A	T	C
Hap1	W196	NAN-29-2	Admix	T	G	C	G	G	A	G	G	T	G
Hap1	W197	Ai-Zi-DAO	IndII	T	G	C	G	G	A	G	G	T	G
Hap1	W198	Babaomi	Ind_Admix	T	G	C	G	G	A	G	G	T	G
Hap1	W199	Diantun502	Ind_Admix	T	G	C	G	G	A	G	G	T	G
Hap1	W200	Heiheaihui	Ind_Admix	T	G	C	G	G	A	G	G	T	G
Hap1	W201	Jiangxisimiao	Ind_Admix	T	G	C	G	G	A	G	G	T	G
Hap1	W202	Laohudao	Ind_Admix	T	G	C	G	G	A	G	G	T	G
Hap1	W203	Linjintangdao	Ind_Admix	T	G	C	G	G	A	G	G	T	G
Hap2	W204	Mengguandamagu	IndI	T	G	G	G	G	A	G	A	T	C
Hap2	W205	Pengshantieganzhan	IndI	T	G	G	G	G	A	G	A	T	C
Hap1	W206	Wumanggaonuo	Ind_Admix	T	G	C	G	G	A	G	G	T	G
Hap4	W207	Yunguang8hao	TeJ	T	G	C	G	A	G	G	G	A	C
Hap4	W208	Zhongchao123	TeJ	T	G	C	G	A	G	G	G	A	C
Hap4	W209	Gizal159	TeJ	T	G	C	G	A	G	G	G	A	C
Hap2	W210	Khao Daeng	IndI	T	G	G	G	G	A	G	A	T	C
Hap1	W211	Basmati370	IndII	T	G	C	G	G	A	G	G	T	G
Hap1	W212	Bhavani	Ind_Admix	T	G	C	G	G	A	G	G	T	G
Hap1	W213	IR50	Ind_Admix	T	G	C	G	G	A	G	G	T	G
Hap4	W214	Jhona349	Aus	T	G	C	G	A	G	G	G	A	C
Hap4	W215	Karnal Local	Aus	T	G	C	G	A	G	G	G	A	C
Hap1	W216	Type3	IndII	T	G	C	G	G	A	G	G	T	G
Hap1	W217	IRAT352	Ind_Admix	T	G	C	G	G	A	G	G	T	G
Hap1	W218	TB154E-TB-2	Ind_Admix	T	G	C	G	G	A	G	G	T	G
Hap4	W219	Domsiah	VI	T	G	C	G	A	G	G	G	A	C
Hap4	W220	Tarommolai1	VI	T	G	C	G	A	G	G	G	A	C
Hap1	W221	MR77 (seberang)	Ind_Admix	T	G	C	G	G	A	G	G	T	G
Hap1	W222	ir6	IndII	T	G	C	G	G	A	G	G	T	G
Hap3	W223	At354	IndII	T	G	C	G	G	A	G	G	T	C
Hap1	W224	BG304	IndII	T	G	C	G	G	A	G	G	T	G
Hap4	W225	Lemont	TrJ	T	G	C	G	A	G	G	G	A	C
Hap4	W226	M401	TeJ	T	G	C	G	A	G	G	G	A	C
Hap1	W227	OM1706	Ind_Admix	T	G	C	G	G	A	G	G	T	G
Hap1	W228	OM1723	IndII	T	G	C	G	G	A	G	G	T	G
Hap1	W229	X21	IndII	T	G	C	G	G	A	G	G	T	G
Hap1	W230	X22	IndII	T	G	C	G	G	A	G	G	T	G
Hap1	W231	X23	IndII	T	G	C	G	G	A	G	G	T	G
Hap1	W232	C71	TeJ	T	G	C	G	G	A	G	G	T	G
Hap2	W233	C70	Ind_Admix	T	G	G	G	G	A	G	A	T	C
Hap2	W234	Q5	Ind_Admix	T	G	G	G	G	A	G	A	T	C
Hap2	W235	Suiyangnian	IndI	T	G	G	G	G	A	G	A	T	C
Hap1	W236	Pokhreli	IndII	T	G	C	G	G	A	G	G	T	G
Hap1	W237	Govnd	IndII	T	G	C	G	G	A	G	G	T	G
Hap1	W238	UPR191-66	IndII	T	G	C	G	G	A	G	G	T	G
Hap1	W239	ASD18	Ind_Admix	T	G	C	G	G	A	G	G	T	G
Hap1	W240	TGMS29	Ind_Admix	T	G	C	G	G	A	G	G	T	G
Hap1	W241	Phalguna	IndII	T	G	C	G	G	A	G	G	T	G
Hap1	W242	Ajaya	Ind_Admix	T	G	C	G	G	A	G	G	T	G
Hap1	W243	Dodda	IndII	T	G	C	G	G	A	G	G	T	G
Hap1	W244	Palung 2	IndII	T	G	C	G	G	A	G	G	T	G
Hap1	W245	TKM6	Ind_Admix	T	G	C	G	G	A	G	G	T	G
Hap1	W246	RUSTYLATE/中413	Ind_Admix	T	G	C	G	G	A	G	G	T	G
Hap2	W247	Yenfangghu	IndI	T	G	G	G	G	A	G	A	T	C
Hap2	W248	Heimichut	IndI	T	G	G	G	G	A	G	A	T	C
Hap4	W249	Teksichut	TeJ	T	G	C	G	A	N	G	G	A	C
Hap4	W250	Eiko	TeJ	T	G	C	G	A	N	G	G	A	C
Hap4	W251	RUBIO	TrJ	T	G	C	G	A	G	G	G	A	C
Hap4	W252	SADRI RICE 1	VI	T	G	C	G	A	G	G	G	A	C
Hap4	W253	Sereendan Kuning	TrJ	T	G	C	G	A	G	G	G	A	C
Hap4	W254	SAI-BUI-BAO	TrJ	T	G	C	G	A	G	G	G	A	C
Hap4	W255	ZIRI	VI	T	G	C	G	A	G	G	G	A	C
Hap4	W256	Dacca6	VI	T	G	C	G	A	G	G	G	A	C
Hap4	W257	Latisai1	TrJ	T	G	C	G	A	G	G	G	A	C
Hap4	W258	Amareles	VI	T	G	C	G	A	G	G	G	A	C
Hap1	W259	Up15	IndII	T	G	C	G	G	A	G	G	T	G
Hap4	W260	Uz-Rosz 275	TrJ	T	G	C	G	A	G	G	G	A	C
Hap3	W261	Ginga	Admix	T	G	C	G	G	A	G	G	T	C
	W262	Bintapan	IndI	T	G	C	G	DEL	DEL	G	G	DEL	C
Hap1	W263	SADAJIRA-19-303	Ind_Admix	T	G	C	G	G	A	G	G	T	G
Hap1	W264	CHOROFA	Ind_Admix	T	G	C	G	G	A	G	G	T	G
Hap1	W265	La110	Ind_Admix	T	G	C	G	G	A	G	G	T	G
Hap1	W266	Yunjiang35	IndIII	T	G	C	G	G	A	G	G	T	G
Hap1	W267	Yunhui72	Ind_Admix	T	G	C	G	G	A	G	G	T	G
Hap2	W268	Wudadaozhong	Ind_Admix	T	G	G	G	G	A	G	A	T	C
Hap1	W269	IR65600-27-1-2-2	Ind_Admix	T	G	C	G	G	A	G	G	T	G
Hap1	W270	Yetuozai	Ind_Admix	T	G	C	G	G	A	G	G	T	G
Hap9	W271	P59279	Ind_Admix	N	N	DEL	DEL	DEL	DEL	DEL	DEL	DEL	DEL
Hap8	W272	Tsao wan ching	Ind_Admix	C	G	C	A	G	G	G	G	T	C
Hap4	W273	Anambae ndanggalasi	TrJ	T	G	C	G	A	G	G	G	A	C
Hap1	W274	Er chiu ching	IndI	T	G	C	G	G	A	G	G	T	G
Hap4	W275	Heen goda wee	TrJ	T	G	C	G	A	G	G	G	A	C
Hap1	W276	Pathma wee	IndIII	T	G	C	G	G	A	G	G	T	G
Hap4	W277	Lakkhi kajal	Aus	T	G	C	G	A	G	G	G	A	C
Hap4	W278	Moisdol	Aus	T	G	C	G	A	G	G	G	A	C
Hap4	W279	Jabor sail	Aus	T	G	C	G	A	G	G	G	A	C
Hap1	W280	Sada solay	Aus	T	G	C	G	G	A	G	G	T	G
Hap4	W281	Sholay	TeJ	T	G	C	G	A	G	G	G	A	C
Hap8	W282	Ma ba you zhan	Ind_Admix	C	G	C	A	G	G	G	G	T	C
Hap9	W283	Daegujo	TeJ	T	G	DEL	DEL	DEL	DEL	DEL	DEL	DEL	DEL
Hap4	W284	Paikasa	TrJ	T	G	C	G	A	G	G	G	A	C
Hap4	W285	Uwi	TrJ	T	G	C	G	A	G	G	G	A	C
Hap7	W286	Garia	Aus	T	G	C	G	G	A	C	G	T	C
Hap4	W287	AUS 449	Aus	T	G	C	G	A	G	G	G	A	C
Hap4	W288	Dourado Precoce	TrJ	T	G	C	G	A	G	G	G	A	C
Hap1	W289	IR 661-1-140-3-117	IndII	T	G	C	G	G	A	G	G	T	G
Hap4	W290	Aichi Asahi	TeJ	T	G	C	G	A	G	G	G	A	C
Hap1	W291	IR 2071-625-1-252	IndII	T	G	C	G	G	A	G	G	T	G
Hap4	W292	Khoia boro	Aus	T	G	C	G	A	G	G	G	A	C
Hap1	W293	IR 8	IndII	T	G	C	G	G	A	G	G	T	G
Hap4	W294	LABELLE	Admix	T	G	C	G	A	G	G	G	A	C
Hap1	W295	LEBONNET	IndII	T	G	C	G	G	A	G	G	T	G
Hap4	W296	AUS 371	Aus	T	G	C	G	A	G	G	G	A	C
Hap7	W297	AUS 373	Aus	T	G	C	G	G	A	C	G	T	C
Hap1	W298	IR 36	IndII	T	G	C	G	G	A	G	G	T	G
Hap1	W299	JAYA	Ind_Admix	T	G	C	G	G	A	G	G	T	G
Hap4	W300	NEW BONNET	TrJ	T	G	C	G	A	G	G	G	A	C
Hap1	W301	IR 64	IndII	T	G	C	G	G	A	G	G	T	G
Hap3	W302	KUNTLAN	TrJ	T	G	C	G	G	A	G	G	T	C
Hap4	W303	British Honduras Creole	TrJ	T	G	C	G	A	G	G	G	A	C
Hap1	W304	CPSLO 17	Admix	T	G	C	G	G	A	G	G	T	G
Hap4	W305	AKITAKOMACHI	TeJ	T	G	C	G	A	G	G	G	A	C
Hap4	W306	BASMATI 385	VI	T	G	C	G	A	G	G	G	A	C
Hap1	W307	AGNO (PSBRC28)	IndII	T	G	C	G	G	A	G	G	T	G
Hap1	W308	PSBRC82	IndII	T	G	C	G	G	A	G	G	T	G
Hap1	W309	NSICRC122	IndII	T	G	C	G	G	A	G	G	T	G
Hap1	W310	BRRI DHAN 29	Ind_Admix	T	G	C	G	G	A	G	G	T	G
Hap1	W311	PR 116	IndII	T	G	C	G	G	A	G	G	T	G
Hap1	W312	CIGEULIS	IndII	T	G	C	G	G	A	G	G	T	G
Hap1	W313	OM 2517	IndII	T	G	C	G	G	A	G	G	T	G
Hap1	W314	BRRI DHAN 28	IndII	T	G	C	G	G	A	G	G	T	G
Hap1	W315	CIBOGO	IndII	T	G	C	G	G	A	G	G	T	G
Hap1	W316	NEDA	IndII	T	G	C	G	G	A	G	G	T	G
Hap1	W317	CIHERANG	IndII	T	G	C	G	G	A	G	G	T	G
Hap1	W318	Qiuqianbai	IndI	T	G	C	G	G	A	G	G	T	G
Hap4	W319	Guangkexiangnuo	TeJ	T	G	C	G	A	N	G	G	A	C
Hap1	W320	Wenxiangnuo	Ind_Admix	T	G	C	G	G	A	G	G	T	G
Hap1	W321	Laozaogu	IndIII	T	G	C	G	G	A	G	G	T	G
Hap2	W322	Lengshuinuo	Ind_Admix	T	G	G	G	G	A	G	A	T	C
Hap4	W323	Feienuo2	Jap_Admix	T	G	C	G	A	G	G	G	A	C
Hap4	W324	Zimangfeie	Jap_Admix	T	G	C	G	A	G	G	G	A	C
Hap4	W325	Guantuibaihe	TeJ	T	G	C	G	A	G	G	G	A	C
Hap4	W326	Haolvguangnian	Jap_Admix	T	G	C	G	A	G	G	G	A	C
Hap4	W327	JinghuB	TeJ	T	G	C	G	A	G	G	G	A	C
Hap2	W328	Sibeitichao6	Admix	T	G	G	G	G	A	G	A	T	C
Hap1	W329	GPNO 5055	TrJ	T	G	C	G	G	A	G	G	T	G
Hap7	W330	ASWINA 330	Aus	T	G	C	G	G	A	C	G	T	C

## Sheet: S5
Table S5 The primer sequences for vectors construction and genotyping assays.
Primers	Vectors	Sequence (5'-3')	Notes
GU6F	pCXUN-Cas9	GCTCTCCCCAACATTGGCCAgttttagagctagaaatagcaag	U6
GU6R		TGGCCAATGTTGGGGAGAGCaacctgagcctcagcgcagc
U6F	pER8-Cas9-U6	CCCCTTTCGCCAGGGGTACCtatgtacagcattacgtagg
U6R		TACGAATTCGAGCTCGGTACCgatggtgcttactgtttag
GKPF	pC1301	tacgaattcgagctcggtaccACAGTGGCATCAGCGATC	KpnI
GHCR		acgacggccagtgccaagcttCTATCTGAACCATTGTCCAAGC	HindIII
GtestF		ACAACTTGATTGCCGTAGA	Genotyping for complemented lines
GtestR		CACCTCTTCTTCCTCTTCTC
GUGtF		TATTGTGGGAGCACGTTC	Genotyping for gene editing lines
GUGtR		TTGTACCTCATCAGCTTGG
None-G7F	Gal4DB	cccccgggctgcaggaattcATGTCGATGGGACCAGCAG	EcoRI
G7E1R		CAATATGACATGATGGTGGCGCTGGCCGC	Connection of two exons
G7E2F		CGCCACCATCATGTCATATTGTGGGAGCACG
None-G7R	Gal4DB	ataagcttgatatcgaattcCTATCTGAACCATTGTCCAAGC	EcoRI
pMAPK6F	190LUC	taaaacgacggccagtgccaagcttCCGCTGCTAGGTTATCTATG	HindIII
pMAPK6R		aggaagggtcttgcagatctGGGAAGGGAAGGGAAAGT	BglII
BD-G7TF	pGBKT7	tggccatggaggccgaattcAAGCAAATCCGGTACGCGTC	EcoRI
BD-G7TR		cgctgcaggtcgacggatccCTATCTGAACCATTGTCCAA	BamHI
BD-MADS1F	pGBKT7	tggccatggaggccgaattcATGGGGAGGGGGAAGGTGGAGCTG	EcoRI
BD-MADS1R		cgctgcaggtcgacggatccTCATATCCAGCCGGATGGGATGTG	BamHI
AD-MADS1F	pGADT7	ccatggaggccagtgaattcATGGGGAGGGGGAAGGTGGAGCTG	EcoRI
AD-MADS1R		agctcgagctcgatggatccTCATATCCAGCCGGATGGGATGTG	BamHI
AD-FBK12F	pGADT7	ccatggaggccagtgaattcATGATGCTGGAAGGCAACTC	EcoRI
AD-FBK12R		agctcgagctcgatggatccTCAACAGCCCATCACAGCA	BamHI
AD-FZPF	pGADT7	ccatggaggccagtgaattcATGAACACTCGAGGCAGC	EcoRI
AD-FZPR		agctcgagctcgatggatccTCAATGGGAGAGGAAGCT	BamHI
AD-NAC024F	pGADT7	ccatggaggccagtgaattcATGGCAATGCAGCTGTCCTTG	EcoRI
AD-NAC024R		agctcgagctcgatggatccTCACTCCTGGGGTTGATCATTGC	BamHI
AD-NAC025F	pGADT7	ccatggaggccagtgaattcATGGCTAACACCGGACTTAGC	EcoRI
AD-NAC025R		agctcgagctcgatggatccTCAATTTGCTTCATTCATGC	BamHI
AD-NF-YC12F	pGADT7	ccatggaggccagtgaattcATGCCGATCCCGGAAAAGGA	EcoRI
AD-NF-YC12R		agctcgagctcgatggatccTCACTCAGGAAGATCTTTGTC	BamHI
AD-RSR1F	pGADT7	ccatggaggccagtgaattcATGGAGTTGGATCTGAAC	EcoRI
AD-RSR1R		agctcgagctcgatggatccTCAATGGTGGTGGTGATG	BamHI
AD-SNBF	pGADT7	ccatggaggccagtgaattcATGGTGCTGGATCTCAATGTG	EcoRI
AD-SNBR		agctcgagctcgatggatccTCAGGCGGTCGGGGGGAAG	BamHI
AD-SLR1F	pGADT7	ccatggaggccagtgaattcATGAAGCGCGAGTACCAAGAAGC	EcoRI
AD-SLR1R		agctcgagctcgatggatccTCACGCCGCGGCGACGCGCCATG	BamHI
BDF		GAATAAGTGCGACATCATCA	Detection for pGBKT7 vectors
BDR		CCCTCAAGACCCGTTTAG
ADF		ACCACTACAATGGATGATGT	Detection for pGADT7 vectors
ADR		ACGATGCACAGTTGAAGT
nGhd7F	nLUC	ggcccggcgcgccactagtgtcgacATGTCGATGGGACCAGCAG	SalI
nGhd7R		gggacgcgtacgagatctggtcgacTCTGAACCATTGTCCAAGC	SalI
nMADS1F	nLUC	ggcccggcgcgccactagtgtcgacATGGGGAGGGGGAAGGTGGAGCTG	SalI
nMADS1R		gggacgcgtacgagatctggtcgacTATCCAGCCGGATGGGATGTG	SalI
cMADS1F	cLUC	ctcgtacgcgtcccggggcggtaccATGGGGAGGGGGAAGGTGGAGCTG	KpnI
cMADS1R		acgaacgaaagctctgcaggtcgacTCATATCCAGCCGGATGGGATGTG	SalI
cFBK12F	cLUC	ctcgtacgcgtcccggggcggtaccATGATGCTGGAAGGCAACTC	KpnI
cFBK12R		acgaacgaaagctctgcaggtcgacTCAACAGCCCATCACAGCA	SalI
cFZPF	cLUC	ctcgtacgcgtcccggggcggtaccATGAACACTCGAGGCAGC	KpnI
cFZPR		acgaacgaaagctctgcaggtcgacTCAATGGGAGAGGAAGCT	SalI
cNAC24F	cLUC	ctcgtacgcgtcccggggcggtaccATGGCAATGCAGCTGTCCTTG	KpnI
cNAC24R		acgaacgaaagctctgcaggtcgacTCACTCCTGGGGTTGATCATTGC	SalI
cNAC25F	cLUC	ctcgtacgcgtcccggggcggtaccATGGCTAACACCGGACTTAGC	KpnI
cNAC25R		acgaacgaaagctctgcaggtcgacTCAATTTGCTTCATTCATGC	SalI
cNF-YC12F	cLUC	ctcgtacgcgtcccggggcggtaccATGCCGATCCCGGAAAAGGA	KpnI
cNF-YC12R		acgaacgaaagctctgcaggtcgacTCACTCAGGAAGATCTTTGTC	SalI
cRSR1F	cLUC	ctcgtacgcgtcccggggcggtaccATGGAGTTGGATCTGAAC	KpnI
cRSR1R		acgaacgaaagctctgcaggtcgacTCAATGGTGGTGGTGATG	SalI
cSNBF	cLUC	ctcgtacgcgtcccggggcggtaccATGGTGCTGGATCTCAATGTG	KpnI
cSNBR		acgaacgaaagctctgcaggtcgacTCAGGCGGTCGGGGGGAAG	SalI
cSLR1F	cLUC	ctcgtacgcgtcccggggcggtaccATGAAGCGCGAGTACCAAGAAGC	KpnI
cSLR1R		acgaacgaaagctctgcaggtcgacTCACGCCGCGGCGACGCGCCATG	SalI
NseqF		GGGGACGAGCTCGGTACCCG	Detection for nLUC vectors
NseqR		GTCCACCTCGATATGTGCATCTG
CseqF		AAGGTCTTACCGGAAAACTCGAC	Detection for cLUC vectors
CseqR		CAAGAAAAACATGTTTCCCAATGC
